# Supplementary material
Source: PubMed Central journal article supplement (PMC5363081)
Supplement: NIHMS832309-supplement.pdf [file NIHMS832309-supplement.pdf]

# Supplementary Data

## The Proline/Glycine-Rich Region Of The Biofilm Adhesion Protein Aap Forms An Extended Stalk That Resists Compaction

Alexander E. Yarawsky<sup>1,2</sup>, Lance R. English<sup>3</sup>, Steven T. Whitten<sup>3</sup>, and Andrew B. Herr<sup>2,4</sup>

<sup>1</sup> Graduate Program in Molecular Genetics, Biochemistry & Microbiology, University of Cincinnati College of Medicine, Cincinnati, Ohio 45267-0524, USA

<sup>2</sup> Division of Immunobiology and Center for Systems Immunology, Cincinnati Children's Hospital Medical Center, Cincinnati, Ohio 45229-3026, USA

<sup>3</sup> Department of Chemistry and Biochemistry, Texas State University, San Marcos, Texas 78666, USA

<sup>4</sup> Division of Infectious Diseases, Cincinnati Children's Hospital Medical Center, Cincinnati, Ohio 45229-3026, USA

**Correspondence to Andrew B. Herr:** Division of Immunobiology, Cincinnati Children's Hospital Medical Center, 3333 Burnet Ave., Cincinnati, OH 45229, Telephone: (513) 803-7490; FAX: (513) 636-5355; E-mail: [andrew.herr@cchmc.org](mailto:andrew.herr@cchmc.org)

**Supplementary data files present in this document include:**

1. **Supplementary Figures S1—S2**
2. **Supplementary Tables S1—S5**

## Supplementary Figures

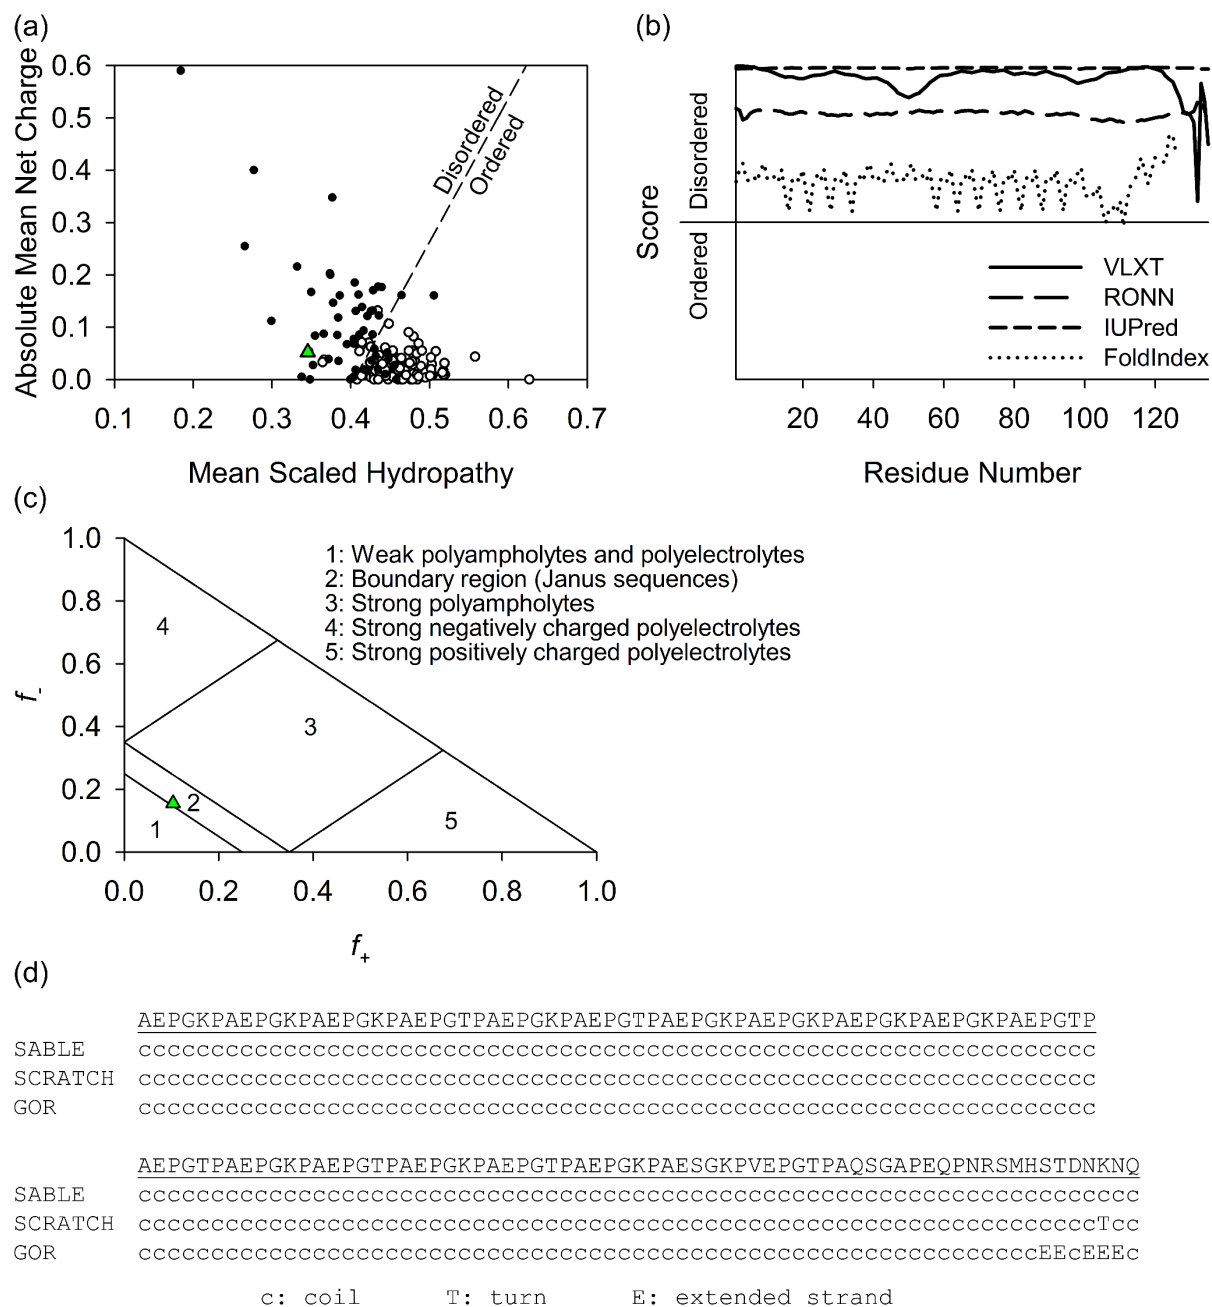

### Figure S1. PGR is predicted to be intrinsically disordered.

Panel (a) is the Uversky plot, showing PGR (*green triangle* – (0.3454, 0.0522)) lies on the portion of the plot where disordered proteins (*black circles*) tend to fall. Ordered proteins are shown in *white circles*. In panel (b), the results from several disorder predictions are plotted. The y-axis units should be considered arbitrary, as these algorithms have different ranges for their predictions; however, these results strongly support the hypothesis that PGR is an IDP. (c) shows PGR (*green triangle* – (0.10370, 0.15556)) in the boundary region (2) of the Das-Pappu phase plot separating weak polyampholytes/polyelectrolytes (1) and strong polyampholytes (3).

Panel (d) shows secondary structure predictions by SABLE, SCRATCH, and GOR servers, each predicting essentially complete random coil.

```

Q9L470_RP62A      EYGPTKAEPGKPAEPGKPAEPGKPAEPGTPAEPGKPAEPGTPAEP-----GKPAEPGKPA  55
Q8CQD9_ATCC 12228 EYGPTKAEPGKPAEPGKPAEPGKPAEPGKPAEPGTPAEPGKPAEP-----GKPAEPGKPA  55
Q6UV38_5179      EYGPTKAEPGKPAEPGKPAEPGKPAEPGTPAEPGKPAEPGTPAEP-----GKPAEPGKPA  55
Q6UV37_5179-R1   EYGPTKAEPGKPAEPGKPAEPGKPAEPGTPAEPGKPAEPGTPAEP-----GKPAEPGKPA  55
A0A075IHN3_1457  EYGPTKAEPGKPAEPGKPAEPGKPAEPGTPAEPGKPAEPGTPAEPGTPSEPGKPAEPGKPA  60
                  *****.*****.*****.****          *****

Q9L470_RP62A      EPGKPAEPGKPAEPGTPAEPGTPAEPGKPAEPGTPAEPGKPAEPGTPAEPGKPAESG--- 112
Q8CQD9_ATCC 12228 EPGKPAEPGKPAEPGTPAEPGTPAEPGKPAEPGKPAEPGTPAEPGKPAEPGTPAEPG--- 112
Q6UV38_5179      EPGKPAEPGKPAEPGTPAEPGTPAEPGKPAEPGTPAEPGKPAEPGTPAEPGKPAESGKPV 115
Q6UV37_5179-R1   EPGKPAEPGKPAEPGTPAEPGTPAEPGKPAEPGTPAEPGKPAEPGTPAEPGKPAESGKPV 115
A0A075IHN3_1457  EPGKPAEPGKPAEPGKPAEPGTPAEPGKPAEPGKPAEPGTPAEPGTPAEPGKPAEPGKPA  120
                  *****.*****.*****.*****.*****.*****.*** *

Q9L470_RP62A      ---KPVEPGTPAQSGAPEQPNRSMHSTDNKNQLPDTG  146
Q8CQD9_ATCC 12228 ---KPAEPGTPTQSGAPEQPNRSMHSTDNKNQLPDTG  146
Q6UV38_5179      EPGKPVEPGTPAQSGAPEQPNRSMHSTDNKNQSPDTG  152
Q6UV37_5179-R1   EPGKPVEPGTPAQSGAPEQPNRSMHSTDNKNQSPDTG  152
A0A075IHN3_1457  EPGKPAEPGTPAQSGAPEQPNRSMHSTDNKNQLPDTG  157
                  *.*****:*****.*****.*****.*****.*****.*** *

```

**Figure S2. The sequence of PGR is highly conserved among *S. epidermidis* strains.** Identical residues are marked with an asterisk (\*), highly conserved residues with a semicolon (:), and weakly conserved residues with a period (.). The UniProt accession number and the name of the strain identify each sequence in the alignment. The NCTC 11047 strain (UniProt accession no. **E0ACJ2**) is significantly longer than the strains shown above, having an additional 7 AEPGKP repeats compared to RP62A (UniProt accession no. **Q9L470**), and thus was omitted for clarity. The Aap from strain PM221 (GenBank accession no. **CDM15051**) contains a region between the last half B-repeat and the LPXTG motif which does not resemble the PGR of any of the above strains, neither in number of residues nor in amino acid content.

## Supplementary Tables

**Table S1. Concentration dependence of sedimentation velocity AUC data**

| PGR Concentration | $s_{20,w}^a$ | $f/f_0^b$ | $M_{calc}^c$ |
|-------------------|--------------|-----------|--------------|
| 25 $\mu$ M        | 1.05         | 2.14      | 14.4 kDa     |
| 75 $\mu$ M        | 1.05         | 2.11      | 14.0 kDa     |
| 150 $\mu$ M       | 1.03         | 2.15      | 14.1 kDa     |
| 225 $\mu$ M       | 1.02         | 2.18      | 14.1 kDa     |
| 300 $\mu$ M       | 0.99         | 2.32      | 14.8 kDa     |

<sup>a</sup>The sedimentation coefficient standardized to 20° C and pure water.

<sup>b</sup>Frictional ratio – the experimental frictional coefficient divided by the frictional coefficient of an ideal, non-hydrated sphere

<sup>c</sup>The molecular weight calculated from the sedimentation coefficient and frictional ratio

**Table S2. Temperature dependence of sedimentation velocity AUC data**

| Temperature (° C) | $s_{20,w}^a$ | $f/f_0^b$ | $M_{calc}^c$ |
|-------------------|--------------|-----------|--------------|
| 4° C              | 1.06         | 2.14      | 15.3 kDa     |
| 20° C             | 1.05         | 2.14      | 14.4 kDa     |
| 37° C             | 1.03         | 2.10      | 13.0 kDa     |

<sup>a</sup>The sedimentation coefficient standardized to 20° C and pure water.

<sup>b</sup>Frictional ratio – the experimental frictional coefficient divided by the frictional coefficient of an ideal, non-hydrated sphere

<sup>c</sup>The molecular weight calculated from the sedimentation coefficient and frictional ratio

**Table S3. Salt dependence of sedimentation velocity AUC data**

| Temperature (° C) | NaCl Concentration | $s_{20,w}^a$ | $f/f_0^b$ | $M_{calc}^c$ |
|-------------------|--------------------|--------------|-----------|--------------|
| 4° C              | 30 mM              | 1.04         | 2.05      | 13.8 kDa     |
|                   | 100 mM             | 1.06         | 2.02      | 13.9 kDa     |
|                   | 300 mM             | 1.06         | 2.00      | 13.8 kDa     |
|                   | 1 M                | 1.03         | 2.00      | 13.2 kDa     |
| 20° C             | 30 mM              | 1.04         | 2.09      | 13.7 kDa     |
|                   | 100 mM             | 1.05         | 2.08      | 13.8 kDa     |
|                   | 300 mM             | 1.04         | 2.08      | 13.7 kDa     |
|                   | 1 M                | 1.00         | 2.19      | 13.8 kDa     |
| 37° C             | 30 mM              | 1.04         | 2.04      | 12.6 kDa     |
|                   | 100 mM             | 1.05         | 2.05      | 12.9 kDa     |
|                   | 300 mM             | 1.03         | 2.09      | 13.0 kDa     |
|                   | 1 M                | 0.98         | 2.12      | 12.2 kDa     |

<sup>a</sup>The sedimentation coefficient standardized to 20° C and pure water.

<sup>b</sup>Frictional ratio – the experimental frictional coefficient divided by the frictional coefficient of an ideal, non-hydrated sphere

<sup>c</sup>The molecular weight calculated from the sedimentation coefficient and frictional ratio

**Table S4. Comparison of hydrodynamic properties for PGR to a dataset of studied IDPs**

| Sequence              | $N^a$ | Net Charge | $R_h$ predicted <sup>b</sup> | $f_{PPII}^c$ | $R_h$ Obs <sup>d</sup> | Reference        |
|-----------------------|-------|------------|------------------------------|--------------|------------------------|------------------|
| <i>Aap-PGR</i>        | 135   | 7          | 38.50                        | 0.5350       | 37.06 <sup>e</sup>     | <i>This work</i> |
| p53(1-93)             | 93    | 15         | 29.51                        | 0.4890       | 32.4                   | [1]              |
| p53(1-93) ALA-        | 93    | 15         | 28.66                        | 0.4581       | 30.4                   | [1]              |
| p53 TAD               | 73    | 14         | 24.79                        | 0.4500       | 23.8                   | [2]              |
| Securin               | 202   | 1          | 42.57                        | 0.4130       | 39.7                   | [3]              |
| PDE- $\gamma$         | 87    | 4          | 26.51                        | 0.4122       | 24.8                   | [4]              |
| Cad136                | 136   | 9          | 33.77                        | 0.4025       | 28.1                   | [5]              |
| HIF1- $\alpha$ -403   | 202   | 29         | 42.13                        | 0.4024       | 44.3                   | [6]              |
| Tau-K45               | 198   | 19         | 41.52                        | 0.3988       | 45.0                   | [7]              |
| HIF1- $\alpha$ -530   | 170   | 10         | 37.81                        | 0.3899       | 38.3                   | [6]              |
| Fos-AD                | 168   | 16         | 37.17                        | 0.3783       | 35.0                   | [8]              |
| ShB-C                 | 146   | 4          | 34.32                        | 0.3764       | 32.9                   | [9]              |
| $\alpha$ -synuclein   | 140   | 9          | 33.47                        | 0.3744       | 28.2                   | [10]             |
| Mlph(147-403)         | 260   | 28         | 47.00                        | 0.3703       | 49.0                   | [11]             |
| CFTR-R-region         | 189   | 5          | 39.18                        | 0.3644       | 32.0                   | [12]             |
| p57-ID                | 73    | 6          | 23.14                        | 0.3636       | 24.0                   | [13]             |
| prothymosin- $\alpha$ | 110   | 43         | 29.02                        | 0.3633       | 33.7                   | [14]             |
| LJIDP1                | 94    | 4          | 26.46                        | 0.3565       | 24.5                   | [15]             |
| Mlph(147-240)         | 97    | 15         | 26.85                        | 0.3528       | 28.0                   | [11]             |
| SNAP25                | 206   | 14         | 40.60                        | 0.3513       | 39.7                   | [16]             |
| Hdm2-ABD              | 97    | 29         | 26.47                        | 0.3345       | 25.7                   | [17]             |
| Vmw65                 | 89    | 19         | 25.13                        | 0.3278       | 28.0                   | [18]             |
| p53(1-93) PRO-        | 93    | 15         | 24.93                        | 0.2832       | 27.4                   | [1]              |

<sup>a</sup>The number of amino acids in the sequence

<sup>b</sup>The predicted  $R_h$  from sequence and according to equation 6 in the main text

<sup>c</sup>The fractional number of PPII residues from sequence and according to intrinsic PPII propensities [19]

<sup>d</sup>The  $R_h$  of the IDP as measured experimentally in the reference listed in the final column

<sup>e</sup>As measured in this study, listed is the average of SEC and DLS measurements.

IDP dataset adapted from Tomasso et al. [19] and sorted by  $f_{PPII}$

**Table S5. Folded proteins and hydrodynamic measurements from literature**

| Sequence                              | $N^a$            | $R_h^b$ | Reference |
|---------------------------------------|------------------|---------|-----------|
| staphylococcal nuclease               | 151 <sup>‡</sup> | 22.5    | [20]      |
| human recombinant lysozyme            | 132 <sup>‡</sup> | 21.8    | [20]      |
| bovine erythrocyte carbonic anhydrase | 267 <sup>‡</sup> | 26.8    | [20]      |
| bovine pancreatic trypsin inhibitor   | 58               | 15.8    | [21]      |
| SH3 domain of PI3 kinase              | 90               | 18.6    | [21]      |
| horse heart cytochrome c              | 104              | 17.8    | [21]      |
| hen lysozyme                          | 129              | 20.5    | [21]      |
| horse myoglobin                       | 153              | 21.2    | [21]      |
| bovine alpha-lactalbumin              | 123              | 18.8    | [21]      |
| bovine pancreatic ribonuclease A      | 124              | 19.0    | [21]      |
| sperm whale apomyoglobin              | 153              | 20.9    | [21]      |
| ubiquitin                             | 76               | 16.5    | [21]      |
| (apo)cytochrome C                     | 104              | 18.5    | [21]      |
| $\alpha$ -lactalbumin                 | 123              | 18.5    | [21]      |
| tumor suppressor, p16                 | 156              | 20.0    | [21]      |
| (apo)myoglobin                        | 154              | 20.9    | [21]      |
| $\beta$ -lactoglobulin                | 162              | 22.0    | [21]      |
| sarcoplasmic calcium binding          | 174              | 21.5    | [21]      |
| adenylate kinase                      | 194              | 21.9    | [21]      |
| tryptophan synthase                   | 268              | 24.2    | [21]      |
| $\beta$ -lactamase                    | 257              | 23.7    | [21]      |
| carbonic anhydrase B                  | 260              | 23.3    | [21]      |
| RTEM $\beta$ -lactamase               | 263              | 24.5    | [21]      |

<sup>a</sup>The number of amino acids in the sequence, taken from [21] unless otherwise noted

<sup>b</sup>Hydrodynamic radius, in Å, reported by the reference listed in the final column

<sup>‡</sup>The number of residues was estimated from the *MW* using the average of 111.6 Da/residue  
Folded protein data set adapted from [21], see [22-24] for additional details and individual references

### Supplemental References

- [1] R.B. Perez, A. Tischer, M. Auton, S.T. Whitten, Alanine and proline content modulate global sensitivity to discrete perturbations in disordered proteins, *Proteins*. 82 (2014) 3373-3384.
- [2] D.F. Lowry, A. Stancik, R.M. Shrestha, G.W. Daughdrill, Modeling the accessible conformations of the intrinsically unstructured transactivation domain of p53, *Proteins*. 71 (2008) 587-598.
- [3] N. Sanchez-Puig, D.B. Veprintsev, A.R. Fersht, Human full-length Securin is a natively unfolded protein, *Protein science : a publication of the Protein Society*. 14 (2005) 1410-1418.
- [4] V.N. Uversky, S.E. Permyakov, V.E. Zagranichny, I.L. Rodionov, A.L. Fink, A.M. Cherskaya, et al., Effect of zinc and temperature on the conformation of the gamma subunit of retinal phosphodiesterase: a natively unfolded protein, *Journal of proteome research*. 1 (2002) 149-159.

- [5] S.E. Permyakov, I.S. Millett, S. Doniach, E.A. Permyakov, V.N. Uversky, Natively unfolded C-terminal domain of caldesmon remains substantially unstructured after the effective binding to calmodulin, *Proteins*. 53 (2003) 855-862.
- [6] N. Sanchez-Puig, D.B. Veprintsev, A.R. Fersht, Binding of natively unfolded HIF-1 $\alpha$  ODD domain to p53, *Molecular cell*. 17 (2005) 11-21.
- [7] A. Soragni, B. Zambelli, M.D. Mukrasch, J. Biernat, S. Jeganathan, C. Griesinger, et al., Structural characterization of binding of Cu(II) to tau protein, *Biochemistry*. 47 (2008) 10841-10851.
- [8] K.M. Campbell, A.R. Terrell, P.J. Laybourn, K.J. Lumb, Intrinsic structural disorder of the C-terminal activation domain from the bZIP transcription factor Fos, *Biochemistry*. 39 (2000) 2708-2713.
- [9] E. Magidovich, I. Orr, D. Fass, U. Abdu, O. Yifrach, Intrinsic disorder in the C-terminal domain of the Shaker voltage-activated K<sup>+</sup> channel modulates its interaction with scaffold proteins, *Proceedings of the National Academy of Sciences*. 104 (2007) 13022-13027.
- [10] K.E. Paleologou, A.W. Schmid, C.C. Rospigliosi, H.Y. Kim, G.R. Lamberto, R.A. Fredenburg, et al., Phosphorylation at Ser-129 but not the phosphomimics S129E/D inhibits the fibrillation of alpha-synuclein, *The Journal of biological chemistry*. 283 (2008) 16895-16905.
- [11] N.C. Geething, J.A. Spudich, Identification of a minimal myosin Va binding site within an intrinsically unstructured domain of melanophilin, *The Journal of biological chemistry*. 282 (2007) 21518-21528.
- [12] J.M.R. Baker, Structural characterization and interactions of the CFTR regulatory region. (2009).
- [13] J.N. Adkins, K.J. Lumb, Intrinsic structural disorder and sequence features of the cell cycle inhibitor p57Kip2, *Proteins*. 46 (2002) 1-7.
- [14] S. Yi, B.L. Boys, A. Brickenden, L. Konermann, W.Y. Choy, Effects of zinc binding on the structure and dynamics of the intrinsically disordered protein prothymosin alpha: evidence for metalation as an entropic switch, *Biochemistry*. 46 (2007) 13120-13130.
- [15] S. Haaning, S. Radutoiu, S.V. Hoffmann, J. Dittmer, L. Giehm, D.E. Otzen, et al., An unusual intrinsically disordered protein from the model legume *Lotus japonicus* stabilizes proteins in vitro, *The Journal of biological chemistry*. 283 (2008) 31142-31152.
- [16] U.B. Choi, J.J. McCann, K.R. Weninger, M.E. Bowen, Beyond the random coil: stochastic conformational switching in intrinsically disordered proteins, *Structure (London, England : 1993)*. 19 (2011) 566-576.
- [17] S.G. Sivakolundu, A. Nourse, S. Moshiah, B. Bothner, C. Ashley, J. Satumba, et al., Intrinsically unstructured domains of Arf and Hdm2 form bimolecular oligomeric structures in vitro and in vivo, *Journal of molecular biology*. 384 (2008) 240-254.
- [18] L. Donaldson, J.P. Capone, Purification and characterization of the carboxyl-terminal transactivation domain of Vmw65 from herpes simplex virus type 1, *The Journal of biological chemistry*. 267 (1992) 1411-1414.
- [19] M.E. Tomasso, M.J. Tarver, D. Devarajan, S.T. Whitten, Hydrodynamic Radii of Intrinsically Disordered Proteins Determined from Experimental Polyproline II Propensities, *PLoS Comput Biol*. 12 (2016) e1004686.
- [20] T.D. Langridge, M.J. Tarver, S.T. Whitten, Temperature effects on the hydrodynamic radius of the intrinsically disordered N-terminal region of the p53 protein, *Proteins*. 82 (2014) 668-678.
- [21] J.A. Marsh, J.D. Forman-Kay, Sequence determinants of compaction in intrinsically disordered proteins, *Biophys. J*. 98 (2010) 2383-2390.
- [22] D.K. Wilkins, S.B. Grimshaw, V. Receveur, C.M. Dobson, J.A. Jones, L.J. Smith, Hydrodynamic Radii of Native and Denatured Proteins Measured by Pulse Field Gradient NMR Techniques, *Biochemistry*. 38 (1999) 16424-16431.
- [23] O. Tcherkasskaya, E.A. Davidson, V.N. Uversky, Biophysical Constraints for Protein Structure Prediction, *J. Proteome Res*. 2 (2003) 37-42.



[24] O. Tcherkasskaya, V.N. Uversky, Denatured collapsed states in protein folding: Example of apomyoglobin, *Proteins: Structure, Function, and Bioinformatics*. 44 (2001) 244-254.
